# Supplementary material for: The Performance of a Survival Nomogram and Albumin–Bilirubin Grade as Prognostic Tools in Advanced Hepatocellular Carcinoma Treated with FOLFOX4
Source: MDPI journal article supplement (doi:10.3390/jpm14040403), 2024-04-11
Supplement: s1 [file s1]

Supplementary Figure S1 The proposed survival nomogram

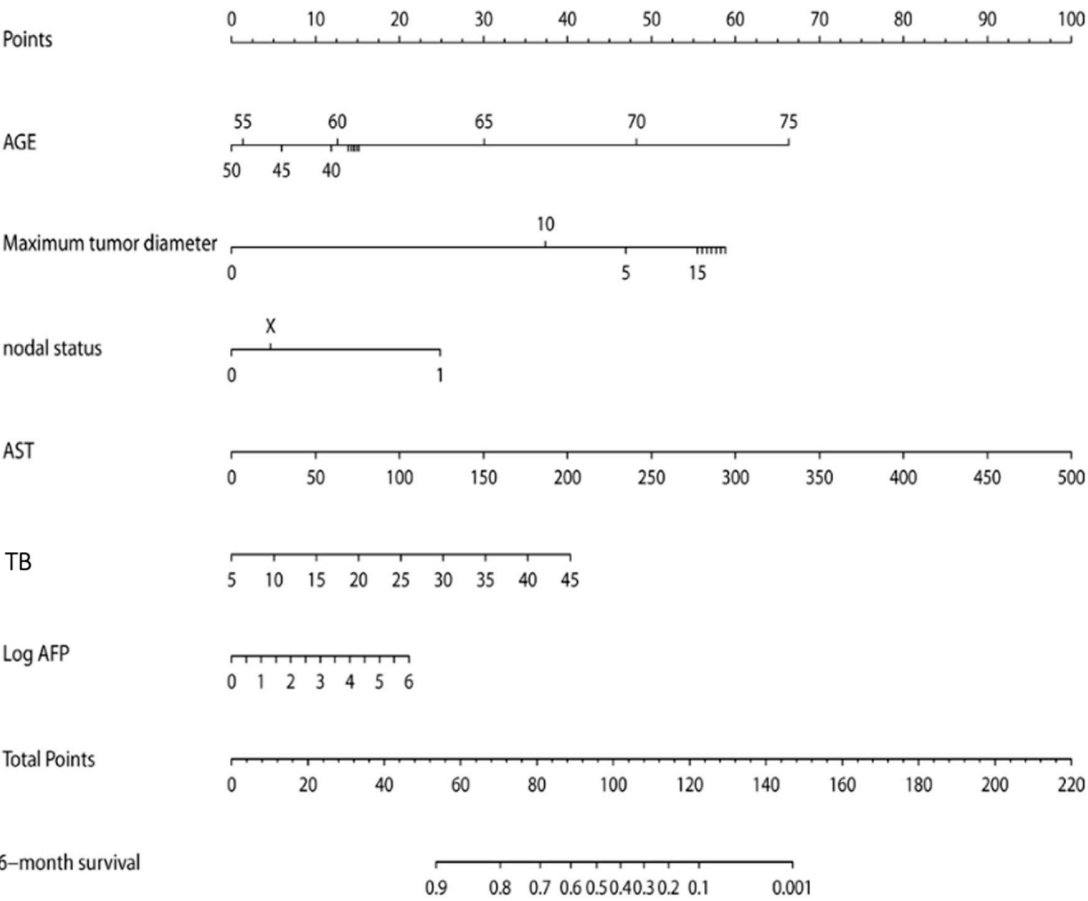

AST, aspartate aminotransferase; TB, total bilirubin; and AFP, alpha-fetoprotein.

**Supplementary Figure S2** Formula used to calculate the ALBI grade and its interpretation

### **FORMULA**

$$\text{ALBI} = (\log_{10} \text{bilirubin} \times 0.66) + (\text{albumin} \times -0.085)$$

- Bilirubin is in  $\mu\text{mol/L}$  and albumin is in  $\text{g/L}$

### **INTERPRETATION**

| <b>ALBI score</b>         | <b>ALBI grade</b> |
|---------------------------|-------------------|
| $\leq -2.60$              | 1                 |
| $> -2.60$ to $\leq -1.39$ | 2                 |
| $> -1.39$                 | 3                 |

Supplementary Figure S3 Overall survival of the patients undergoing different treatment lines

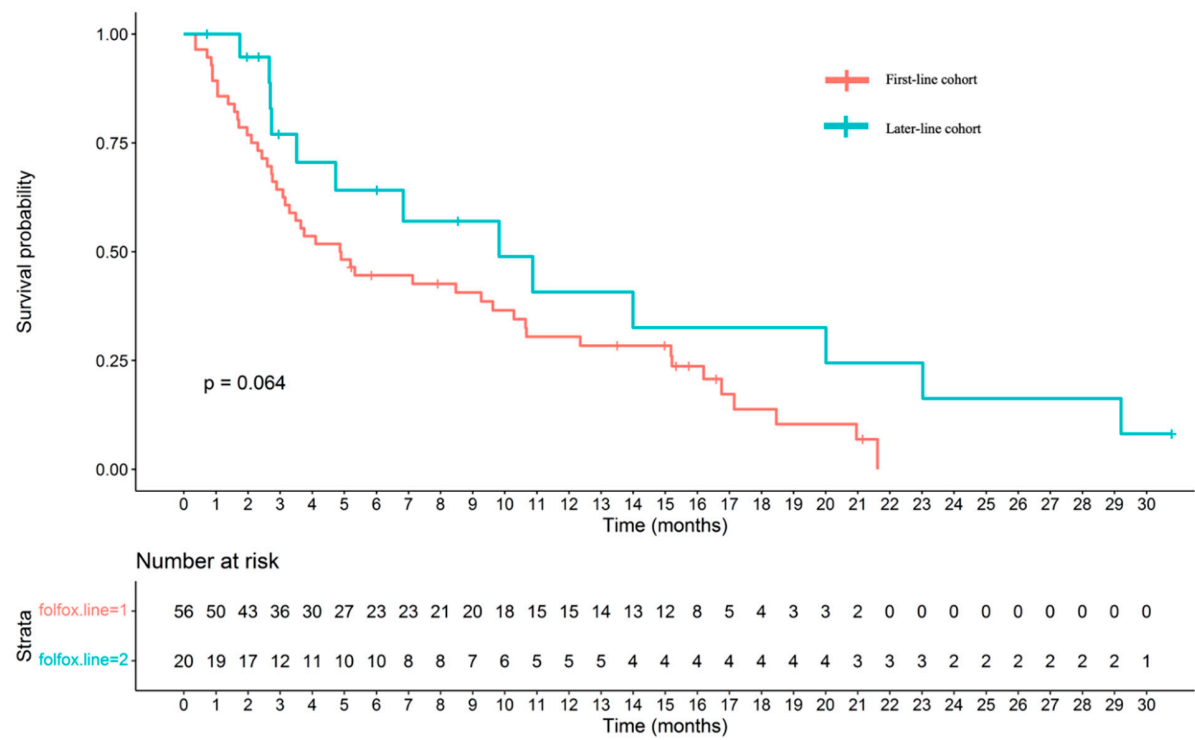

Supplementary Figure S4 Progression-free survival of the patients undergoing different treatment lines

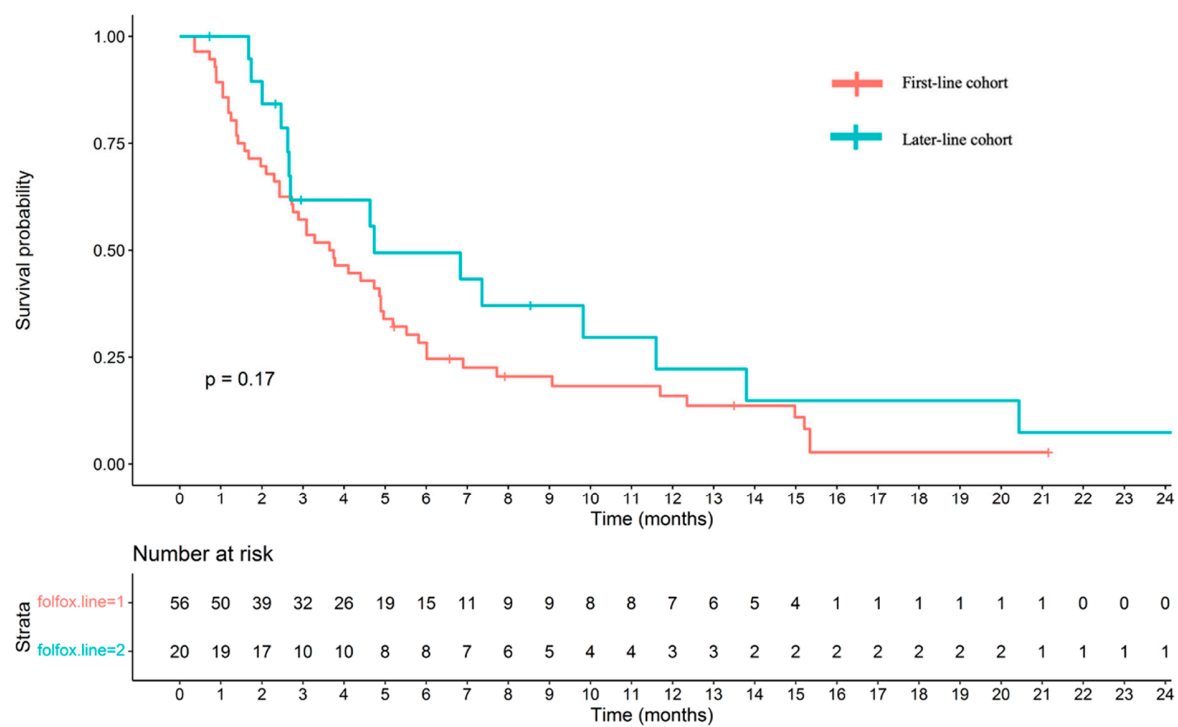

**Supplementary Figure S5** Overall survival of the risk groups of the first-line cohort classified based on the proposed survival nomogram

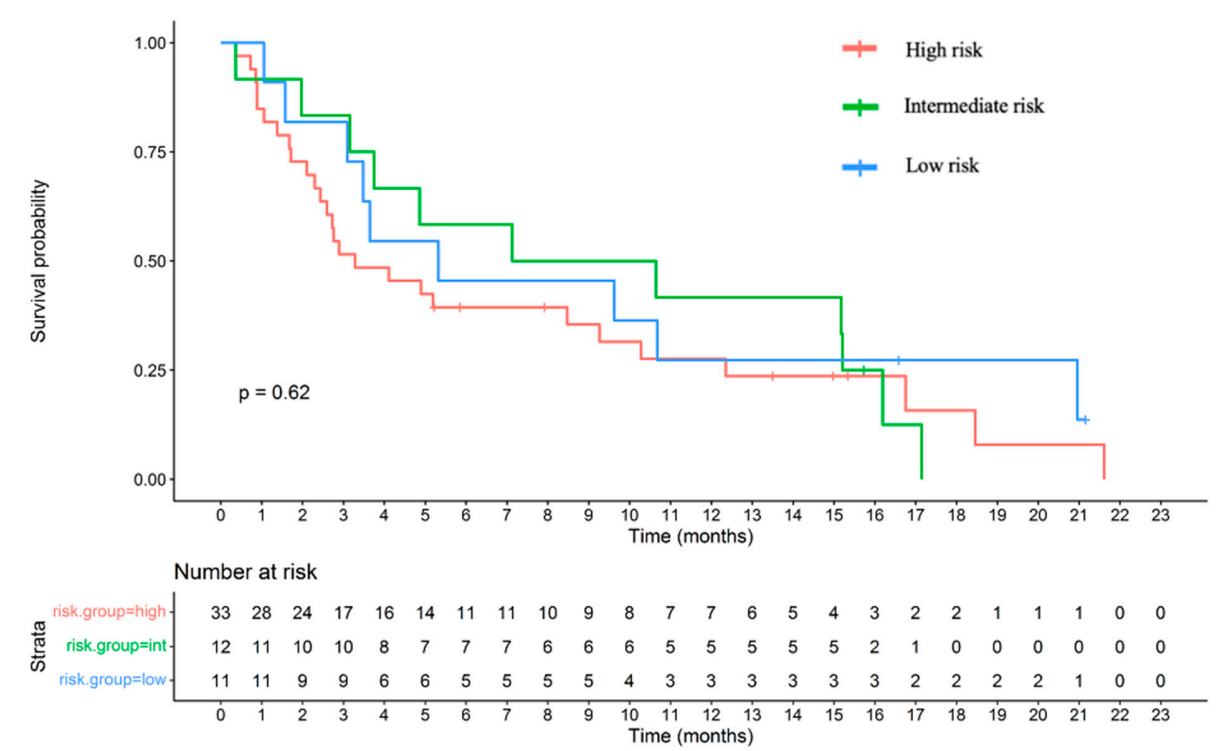

**Supplementary Figure S6** Overall survival of the patients in the first-line cohort classified using the ALBI grade

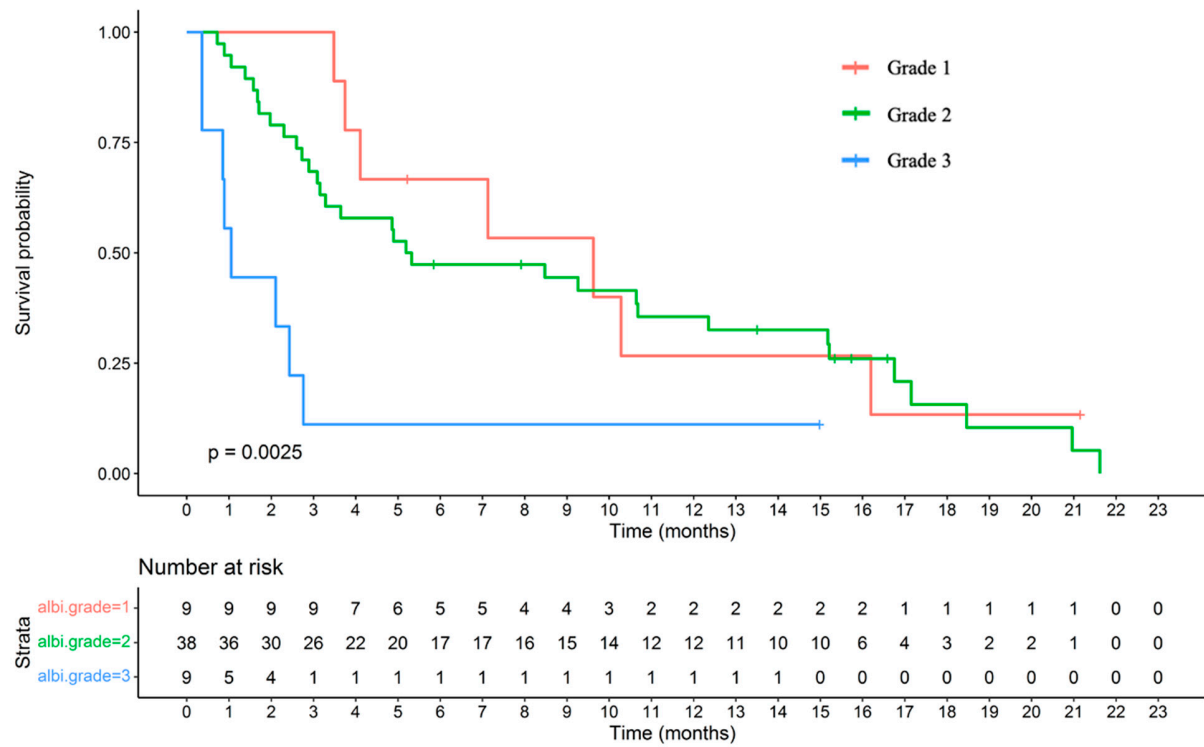

**Supplementary Table S1** Categorization of the patients into three risk groups and three grades using the survival nomogram and ALBI grade

| Number of patients, n (%) | Survival nomogram |                   |           | ALBI grade |           |           |
|---------------------------|-------------------|-------------------|-----------|------------|-----------|-----------|
|                           | Low-risk          | Intermediate-risk | High-risk | 1          | 2         | 3         |
| Total                     | 17 (22.4)         | 19 (25.0)         | 40 (52.6) | 15 (19.7)  | 51 (67.1) | 10 (13.2) |
| First-line cohort         | 11 (19.6)         | 12 (21.4)         | 33 (59.0) | 9 (16.1)   | 38 (67.9) | 9 (16.1)  |
| Later-line cohort         | 6 (30.0)          | 7 (35.0)          | 7 (35.0)  | 6 (30.0)   | 13 (65.0) | 1 (5.0)   |

**Supplementary Table S2** Treatment information and subsequent treatments

|                                                   | <b>Total<br/>(n = 76)</b> | <b>First-line<br/>chemotherapy<br/>(n = 56)</b> | <b>Later- line<br/>chemotherapy<br/>(n = 20)</b> |
|---------------------------------------------------|---------------------------|-------------------------------------------------|--------------------------------------------------|
| <b>Number of FOLFOX4 cycles,<br/>median (IQR)</b> | 3 (2.0, 8.0)              | 2 (1.0, 7.2)                                    | 5 (2.8, 11.2)                                    |
| <b>Oxaliplatin</b>                                |                           |                                                 |                                                  |
| Starting dose, n (%)                              |                           |                                                 |                                                  |
| - Full dose                                       | 40 (52.6)                 | 28 (50.0)                                       | 12 (60.0)                                        |
| - First-level reduction                           | 31 (40.8)                 | 23 (41.1)                                       | 8 (40.0)                                         |
| - Second-level reduction                          | 5 (6.6)                   | 5 (8.9)                                         | 0 (0)                                            |
| Dose reduction, n (%)                             | 58 (76.3)                 | 42 (75.0)                                       | 16 (80.0)                                        |
| <b>5-FU</b>                                       |                           |                                                 |                                                  |
| Starting dose, n (%)                              |                           |                                                 |                                                  |
| - Full dose                                       | 67 (88.2)                 | 50 (89.3)                                       | 17 (85.0)                                        |
| - First-level reduction                           | 7 (9.2)                   | 4 (7.1)                                         | 3 (15.0)                                         |
| - Second-level reduction                          | 2 (2.6)                   | 2 (3.6)                                         | 0 (0)                                            |
| Dose reduction, n (%)                             | 20 (26.3)                 | 12 (21.4)                                       | 8 (40.0)                                         |
| <b>Discontinuation of FOLFOX4,<br/>n (%)</b>      |                           |                                                 |                                                  |
| Complete course                                   | 3 (3.9)                   | 2 (3.6)                                         | 1 (5.0)                                          |
| Death                                             | 9 (11.8)                  | 8 (14.3)                                        | 1 (5.0)                                          |
| Liver decompensation                              | 13 (17.1)                 | 10 (17.9)                                       | 3 (15.0)                                         |
| Patient preference                                | 3 (3.9)                   | 3 (5.4)                                         | 0 (0)                                            |
| Progressive disease                               | 30 (39.5)                 | 21 (37.5)                                       | 9 (45.0)                                         |
| Poor performance status<br>(declined)             | 9 (11.8)                  | 8 (14.3)                                        | 1 (5.0)                                          |
| Referred to nearby hospital                       | 1 (1.3)                   | 1 (1.8)                                         | 0 (0)                                            |
| Toxicity                                          | 1 (1.3)                   | 0 (0)                                           | 1 (5.0)                                          |
| <b>Subsequent therapy, n(%)</b>                   | 12 (15.8)                 | 8 (14.3)                                        | 4 (20.0)                                         |
| Systemic therapy, n(%)                            | 9 (11.8)                  | 7 (12.5)                                        | 2 (10.0)                                         |
| - Doxorubicin                                     | 6 (7.9)                   | 5 (8.9)                                         | 1 (5.0)                                          |
| - FOLFOX4 (beyond<br>progression)                 | 3 (3.9)                   | 2 (3.6)                                         | 1 (5.0)                                          |
| Palliative radiotherapy, n(%)                     | 3 (3.9)                   | 1 (1.8)                                         | 2 (10.0)                                         |

IQR, interquartile range; FOLFOX, folinic acid (leucovorin), 5-fluorouracil (5-FU), and oxaliplatin.



**Supplementary Table S3** Multivariate Cox proportional hazards regression model for the survival nomogram

| Variable               | Hazard ratio (95% CI) | P-value |
|------------------------|-----------------------|---------|
| Age                    | 0.98 (0.96, 1.00)     | 0.075   |
| Lymph node             | 1.21 (0.57, 2.58)     | 0.613   |
| TB                     | 1.27 (1.12, 1.43)     | <0.001  |
| AST                    | 1.002 (1.00, 1.004)   | 0.052   |
| Maximum tumor diameter | 0.99 (0.95, 1.04)     | 0.731   |
| Log AFP                | 1.06 (0.96, 1.16)     | 0.263   |

AST, aspartate aminotransferase; AFP, alpha-fetoprotein; CI, confidence interval; and TB, total bilirubin.

**Supplementary Table S4** Multivariate Cox proportional hazards regression model for the ALBI grade

| Variable        | Hazard ratio (95% CI) | P-value |
|-----------------|-----------------------|---------|
| Albumin         | 0.67 (0.37, 1.24)     | 0.206   |
| Total bilirubin | 1.27 (1.14, 1.43)     | <0.001  |

CI, confidence interval.

**Supplementary Table S5** Differences in the baseline characteristics between the patients in our study and those in the EACH study

|                              | <b>Our study<br/>(n = 76)</b> | <b>EACH study<br/>(n = 187)</b>  |
|------------------------------|-------------------------------|----------------------------------|
| Age (mean), years            | 56.5                          | 50                               |
| Men, %                       | 82.9                          | 90.2                             |
| Cirrhosis, %                 | 90.8                          | 55.4                             |
| Child–Turcotte–Pugh score, % |                               |                                  |
| A                            | 73.7                          | 88.6                             |
| B                            | 26.3                          | 11.4                             |
| Etiology, %                  |                               |                                  |
| HBV                          | 73.7                          | 92.9                             |
| HCV                          | 14.5                          | 4.97                             |
| Alcohol                      | 15.8                          | -                                |
| Number of liver tumors, %    |                               |                                  |
| 0                            | 10.5                          | 3 (1–11)<br>Median (IQR)         |
| 1–5                          | 46.1                          |                                  |
| 6–10                         | 5.2                           |                                  |
| >10                          | 31.6                          |                                  |
| Infiltrative type            | 6.6                           |                                  |
| Maximum tumor size, cm (SD)  | 11.0 (6)                      | 7.85 (4.75–11.7)<br>Median (IQR) |
| AFP, ng/dL                   | 5630.5                        | 1312                             |
| BCLC, %                      |                               |                                  |
| B                            | 11.8                          | 21.2                             |
| C                            | 88.2                          | 78.8                             |
| Extrahepatic metastasis, %   | 52.6                          | 56.5                             |
| Portal vein thrombosis, %    | 56.6                          | 60.9                             |
| Ascites, %                   | 10.5                          | 3.3                              |
| TB, mg/dL                    | 1.2                           | 0.91                             |
| AST, U/L                     | 101.5                         | 38                               |

HBV, hepatitis B virus; HCV, hepatitis C virus; SD, standard deviation; IQR, interquartile range; AFP, alpha-fetoprotein; BCLC, Barcelona Clinic Liver Cancer; ALBI score, albumin–bilirubin score; TB, total bilirubin; and AST, aspartate aminotransferase.

**Supplement Table S6** Differences in the efficacy of the FOLFOX or XELOX chemotherapy regimens in clinical trials enrolling patients with advanced hepatocellular carcinoma

| Study                | Design                            | No. of patients | Treatment           | DCR (%)                         | ORR (%)                         | TTP/PFS     | Median OS   | Cirrhosis (%) | CTP A/B (%) | 2L setting (%)        |
|----------------------|-----------------------------------|-----------------|---------------------|---------------------------------|---------------------------------|-------------|-------------|---------------|-------------|-----------------------|
| <b>Qin S et al.</b>  | Open-label, randomized, phase III | 184/187         | FOLFOX4/doxorubicin | 52.17                           | 8.15                            | 2.93 months | 6.4 months  | 55.7          | 88.6/11.4   | 20.6                  |
| <b>Qin S et al.</b>  | Open-label, randomized, phase III | 140/139         | FOLFOX4/doxorubicin | 47.1                            | 8.6                             | 2.4 months  | 5.7 months  | 55.4          | 90/10       | 20.7                  |
| <b>Yang L et al.</b> | Single-arm                        | 77              | FOLFOX4             | 55.6                            | 4.2                             | 2.7 months  | 6.1 months  | -             | 77.9/22.1   | -                     |
| <b>Zhou et al.</b>   | Single-arm                        | 20              | FOLFOX              | 60.0                            | 20.0                            | 2.2 months  | 5.0 months  | -             | 68.8/31.2   | -                     |
| <b>Yang L et al.</b> | Clinical observation              | 31              | CAPOX               | 42.9                            | 7.1                             | 2.9 months  | N/A         | 54.8          | 80.6/19.4   | -                     |
| <b>Yin Z et al.</b>  | Clinical observation              | 20/20           | CAPOX/FOLFOX6       | 55.0                            | 5.0                             | 2.1 months  | 9 months    | -             | -           | -                     |
| <b>He SL et al.</b>  | Single-arm                        | 32              | CAPOX               | 62.5                            | 21.9                            | 4.2 months  | 9.2 months  | -             | -           | -                     |
| <b>Wang F et al.</b> | Clinical observation              | 13              | FOLFOX4/CAPOX       | 61.5                            | 15.4                            | 3.9 months  | 8.0 months  | -             | -           | 100.0 after sorafenib |
| <b>Our study</b>     | Retrospective                     | 76              | FOLFOX4             | 31.5 (ITT)<br>60.0 (assessable) | 11.8 (ITT)<br>22.5 (assessable) | 4.11 months | 5.32 months | 90.8          | 73.7/26.3   | 26.3                  |

FOLFOX, folinic acid (leucovorin), 5-fluorouracil, and oxaliplatin; CAPOX, capecitabine and oxaliplatin; DCR, disease control rate; ORR, objective response rate; TTP, time to progression; PFS, progression-free survival; OS, overall survival; CTP, Child–Turcotte–Pugh; ITT, and intention to treat.
